# Supplementary material
Source: PubMed Central journal article supplement (PMC4879401)
Supplement: AAC.02180-15_zac006165196so1.pdf [file AAC.02180-15_zac006165196so1.pdf]

**Supplemental Table 1. Primers used in RT PCR**

| <b>Gene</b>            | <b>Primer sequence (5'-3')</b> | <b>Tm (°C)</b> |
|------------------------|--------------------------------|----------------|
| <b>16s rRNA</b>        | F: CGGACGGGTGAGTAATGCTT        | 60.11          |
|                        | R: CAGACCCGCTACAGATCGTC        | 59.97          |
| <b>ompA</b>            | F: GCTGCTAATGCTGGCGTAAC        | 59.97          |
|                        | R: ACTCGATACCAAGAGCTGCG        | 59.90          |
| <b>pgaC</b>            | F: TGCCGAGATGGTGATTAGCC        | 59.89          |
|                        | R: GGGGCAACCTGTCTCATTCA        | 59.96          |
| <b>lpxA</b>            | F: TCGCGAACATTGCAGCTTAC        | 59.56          |
|                        | R: CATGTCCAGCGACACCTACA        | 59.75          |
| <b>basC</b>            | F: GGGTTGCTCCGATCCCTAAG        | 59.89          |
|                        | R: TGTCGCAGCTACAGGCTATG        | 59.90          |
| <b>basD</b>            | F: TGAAAGGTAGAGACGGAGCAG       | 60.0           |
|                        | R: AATACGGACGGACCCTGAC         | 59.7           |
| <b>barB</b>            | F: CAATCGGTGGGTAAACAAGG        | 57.8           |
|                        | R: ATCCAAGGCAGAGGTTGCT         | 57.6           |
| <b>bauA</b>            | F: GGTGGGTGGAACGGTAAATC        | 59.8           |
|                        | R: CATTGATACGAACGCCGAAT        | 55.8           |
| <b>ptk</b>             | F: CGATGTTGATGTGAAACCAG        | 55.8           |
|                        | R: TTGGGCTCTTACCACGAGT         | 57.6           |
| <b>PLC<sub>2</sub></b> | F: TGAATGAGGGGAACCAAGGAT       | 55.8           |
|                        | R: CATACCAATGCCCAACATCA        | 55.8           |
| <b>PLD<sub>2</sub></b> | F: TGGCACAATCCTTTCATTCC        | 55.8           |
|                        | R: TGGTTCAGGGCTATGTTTGG        | 57.8           |
| <b>abaI</b>            | F: CGCTACAGGGTATTTGTTGA        | 55.8           |
|                        | R: CTTGAGCCACGACATAAGC         | 57.6           |

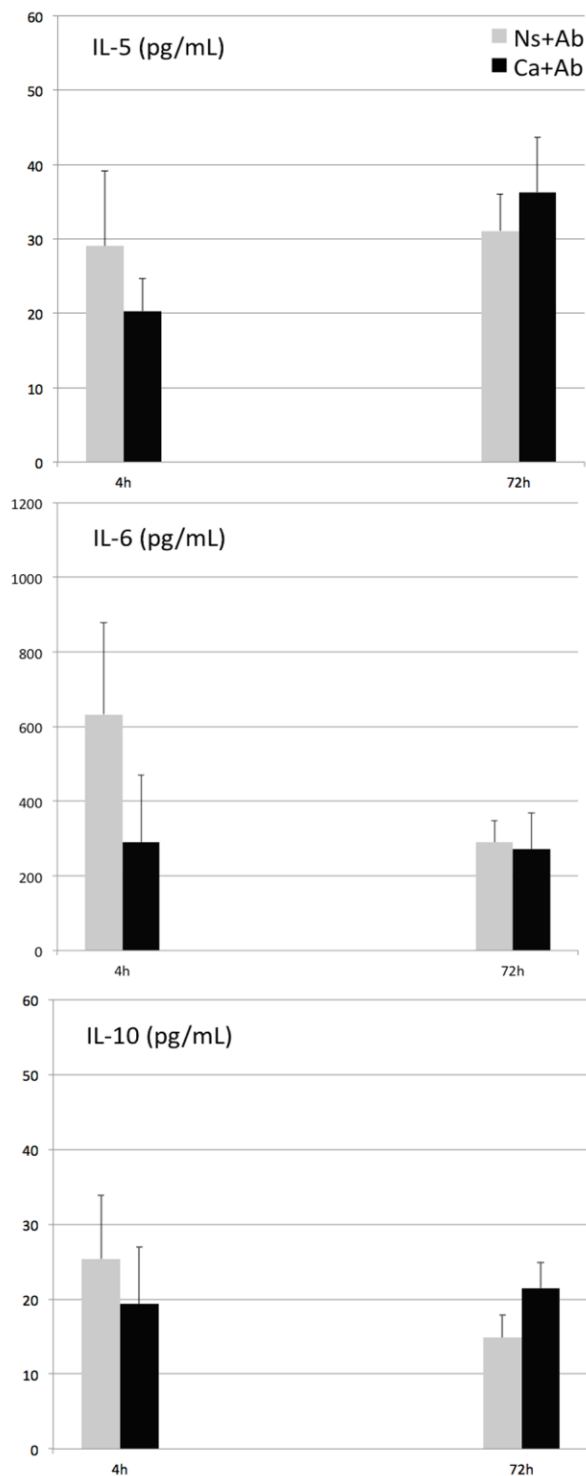

**Supplemental Figure 1. Effects of *C. albicans* airway colonization on rat  $T_H2$  cytokine response to subsequent *A. baumannii* infection.**  $3 \times 10^6$  CFU *C. albicans* was inoculated into rats' airway in experimental group (Ca+Ab), and equivalent volume normal saline was given to rats in control group (Ns+Ab) instead. All rats were challenged with  $1 \times 10^8$  CFU *A. baumannii* 24 hours later and sacrificed at the indicated time points in order to obtain supernatant of lungs homogenate for IL-5, 6, 10 measurements. All values represent means  $\pm$  SD.

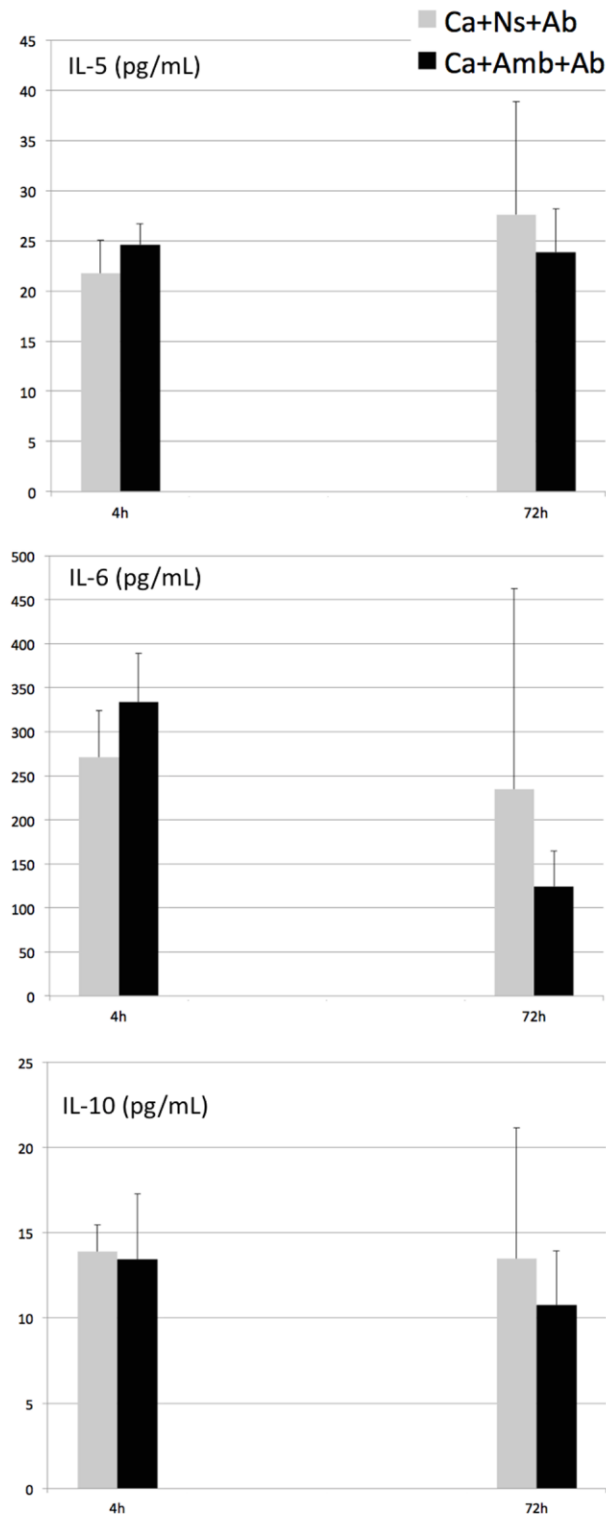

**Supplemental Figure 2. Effects of antifungal treatment on rat  $T_H2$  cytokine response to subsequent *A. baumannii* infection.** *Candida*-colonized rats received either amphotericin-B (Ca+Amb+Ab) or saline (Ca+Ns+Ab) by intraperitoneal injection for 3 days, were subsequently infected with *A. baumannii* and sacrificed at the indicated time points in order to obtain supernatant of lungs homogenate for IL-5, 6, 10 measurements. All values represent means  $\pm$  SD.
